# Supplementary material
Source: Springer Nature journal article supplement (https://www.springermedizin.de/resource/supplementary/13002_2011_246_MOESM6_ESM.pdf/9627486)

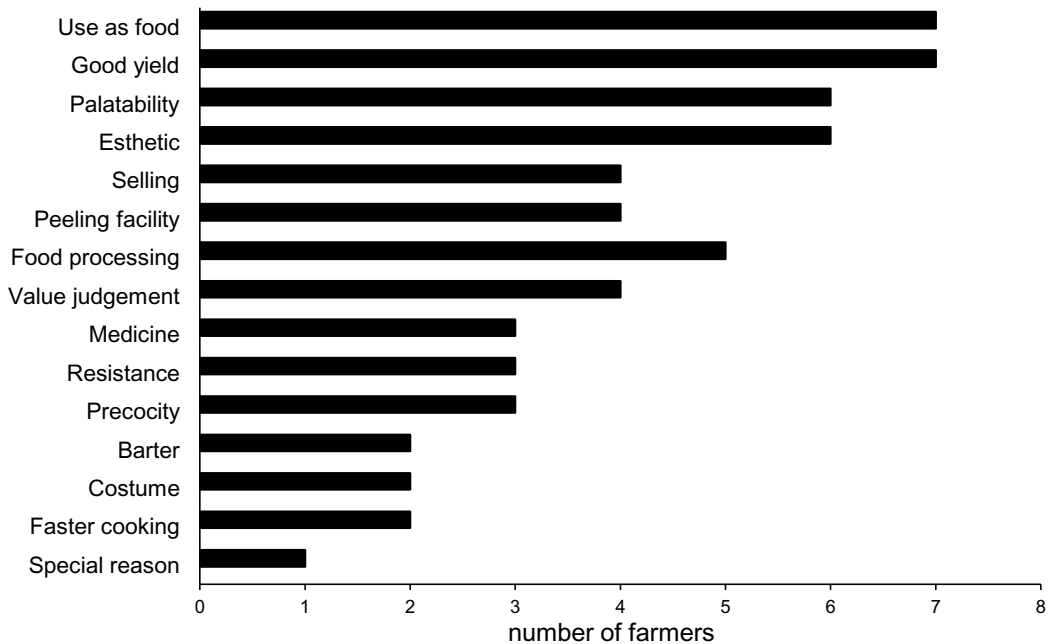

Supplement: MOESM6 [file 9627486]
